# Supplementary material for: Microevolution of Burkholderia pseudomallei during an Acute Infection
Source: PubMed Central journal article supplement (PMC4313173; doi:10.1128/jcm.01219-14), 2014-09
Supplement: JCM.01219-14_zjm999093677so2.pdf [file JCM.01219-14_zjm999093677so2.pdf]

|     |           |                  |              |         |                                                            |
|-----|-----------|------------------|--------------|---------|------------------------------------------------------------|
| C28 | ERS008805 | Head W/S         | 17 July 2006 | -       | -                                                          |
| C29 | ERS008806 | Head W/S         | 17 July 2006 | 1764k † | -                                                          |
| C30 | ERS008807 | Head W/S         | 17 July 2006 | -       | -                                                          |
| C31 | ERS008808 | Urine            | 17 July 2006 | -       | -                                                          |
| C32 | ERS008809 | Urine            | 17 July 2006 | -       | -                                                          |
| C33 | ERS008810 | Urine            | 17 July 2006 | -       | -                                                          |
| C34 | ERS008811 | Urine            | 17 July 2006 | -       | Chromosome 1, position 1894305, 7 bp deletion of CGACGAC   |
| C35 | ERS008812 | Urine            | 17 July 2006 | 1764k † | Chromosome 1, position 730660, 5bp deletion GCACC          |
| C36 | ERS008813 | Urine            | 17 July 2006 | -       | -                                                          |
| C37 | ERS008814 | Urine            | 17 July 2006 | -       | -                                                          |
| C38 | ERS008815 | Urine            | 17 July 2006 | -       | -                                                          |
| C39 | ERS008816 | Urine            | 17 July 2006 | -       | Chromosome 1, position 2485411, C -> T                     |
| C40 | ERS008817 | Urine            | 17 July 2006 | 933k *  | -                                                          |
| C41 | ERS008818 | Tracheal suction | 17 July 2006 | -       | -                                                          |
| C42 | ERS008819 | Tracheal suction | 17 July 2006 | -       | -                                                          |
| C43 | ERS008820 | Tracheal suction | 17 July 2006 | 1764k † | Chromosome 1, position 730660, 5bp deletion GCACC          |
| C44 | ERS008821 | Tracheal suction | 17 July 2006 | -       | -                                                          |
| C45 | ERS008822 | Tracheal suction | 17 July 2006 | 2050k * | -                                                          |
| C46 | ERS008823 | Tracheal suction | 17 July 2006 | -       | -                                                          |
| C47 | ERS008824 | Tracheal suction | 17 July 2006 | -       | -                                                          |
| C48 | ERS008825 | Tracheal suction | 17 July 2006 | -       | -                                                          |
| C49 | ERS008826 | Tracheal suction | 17 July 2006 | -       | Chromosome 1, position 4305318, G -> C                     |
| C50 | ERS008827 | Tracheal suction | 17 July 2006 | -       | -                                                          |
| C51 | ERS008828 | Thigh W/S        | 18 July 2006 | -       | -                                                          |
| C52 | ERS008829 | Thigh W/S        | 18 July 2006 | -       | -                                                          |
| C53 | ERS008830 | Thigh W/S        | 18 July 2006 | -       | -                                                          |
| C54 | ERS008831 | Thigh W/S        | 18 July 2006 | -       | -                                                          |
| C55 | ERS008832 | Thigh W/S        | 18 July 2006 | -       | Chromosome 2, position 3078443, 9bp insertion of GAGTGCGGC |
| C56 | ERS008833 | Thigh W/S        | 18 July 2006 | -       | Chromosome 1, position 196095 C -> A                       |
| C57 | ERS008834 | Thigh W/S        | 18 July 2006 | -       | -                                                          |
| C58 | ERS008835 | Thigh W/S        | 18 July 2006 | 1764k † | -                                                          |
| C59 | ERS008836 | Thigh W/S        | 18 July 2006 | -       | -                                                          |
| C60 | ERS008837 | Thigh W/S        | 18 July 2006 | -       | -                                                          |
| C61 | ERS008838 | Isolator         | 17 July 2006 | -       | -                                                          |
| C62 | ERS008839 | Isolator         | 17 July 2006 | -       | -                                                          |

|     |           |          |              |       |                                                                                                          |
|-----|-----------|----------|--------------|-------|----------------------------------------------------------------------------------------------------------|
| C63 | ERS008840 | Isolator | 17 July 2006 | -     | -                                                                                                        |
| C64 | ERS008841 | Isolator | 17 July 2006 | -     | -                                                                                                        |
| C65 | ERS008842 | Isolator | 17 July 2006 | -     | -                                                                                                        |
| C66 | ERS008843 | Isolator | 17 July 2006 | -     | -                                                                                                        |
| C67 | ERS008844 | Isolator | 17 July 2006 | -     | -                                                                                                        |
| C68 | ERS008845 | Isolator | 17 July 2006 | -     | -                                                                                                        |
| C69 | ERS008846 | Isolator | 17 July 2006 | 20k † | Chromosome 1, position 3990517, G -> A                                                                   |
| C70 | ERS008847 | Isolator | 17 July 2006 | -     | Chromosome 2, 1621217, 56 bp deletion of<br>CTGGATGCTGGATGCTGGATGCTGGATGCTGGATGCTGGATGCT<br>GGATGCTGGATG |

\* Not supported by the sequence data

† Unable to examine due to the size of the VNTR
